# Supplementary material
Source: publisher site journal article supplement (https://www.spandidos-publications.com/4333/downloadSupplementary)

Figure S1. Transfection efficiency following shRNA transfection. The transfection efficiency was examined using western blot analysis. \*\*P<0.01.

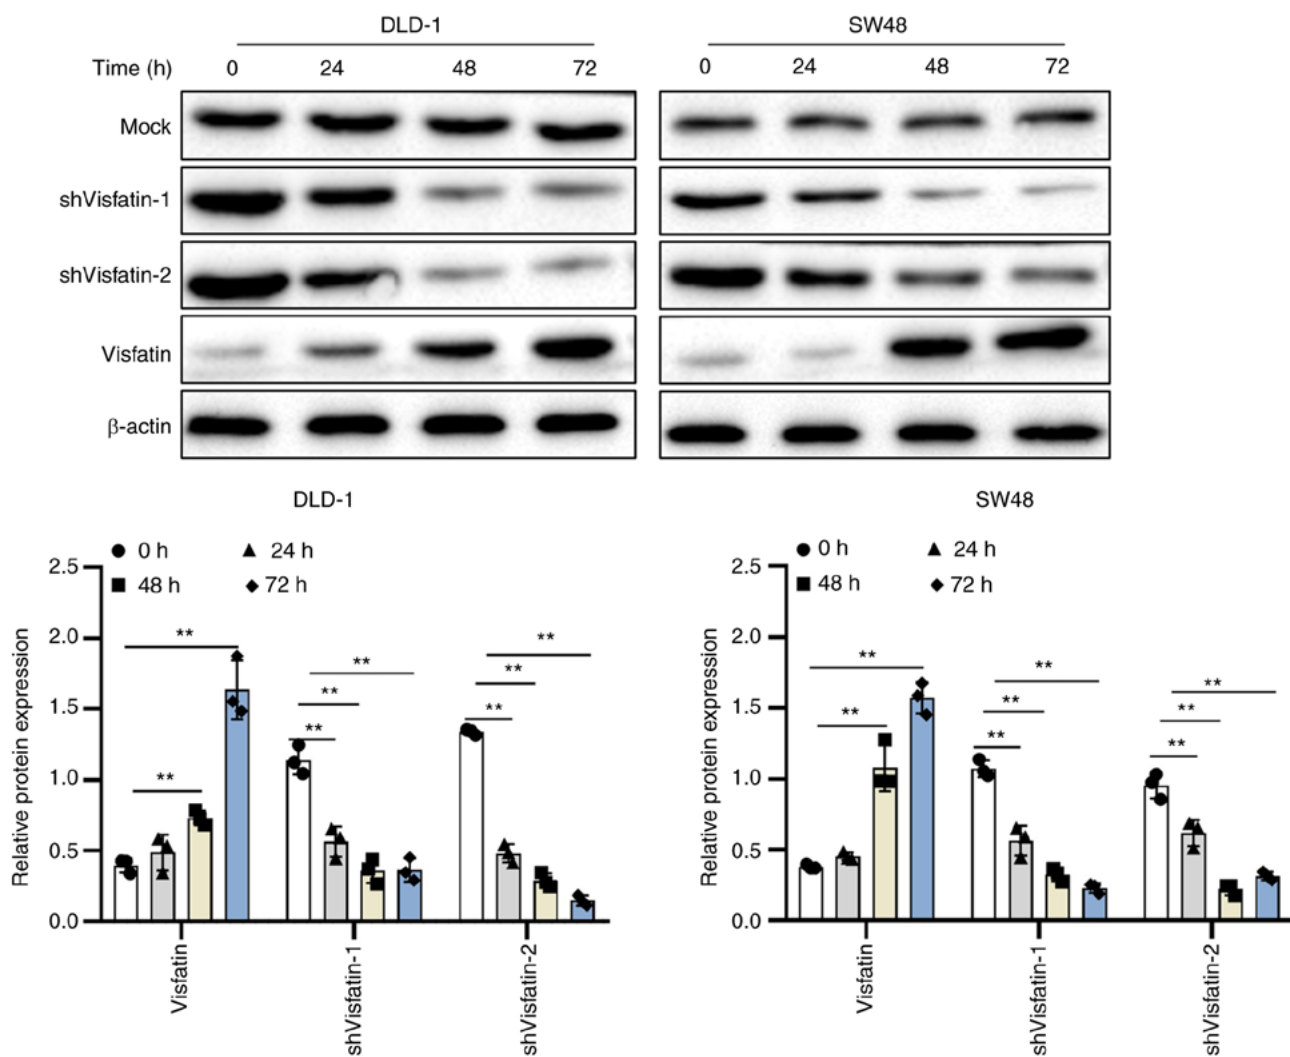

Figure S2. Visfatin inhibits the 5-FU-induced apoptosis of DLD-1 and SW48 cells. (A) 5-FU-mediated cell apoptosis were reversed by visfatin overexpression in colon cancer cells, measured using flow cytometry. (B) 5-FU (40  $\mu$ M) induced caspase substrates, as examined using western blot analysis with anti-cleaved caspase substrate antibodies in DLD-1 and SW48 cells. (C) Visfatin reduced cleaved caspase-3 expression, as measured using immunofluorescence assay in DLD-1 and SW48 cells treated with 5-FU (40  $\mu$ M) for 24 h. (D) Visfatin reduced 5-FU-induced caspase-3/7 activity. \* $P$ <0.05 and \*\* $P$ <0.01. 5-FU, 5-fluorouracil.

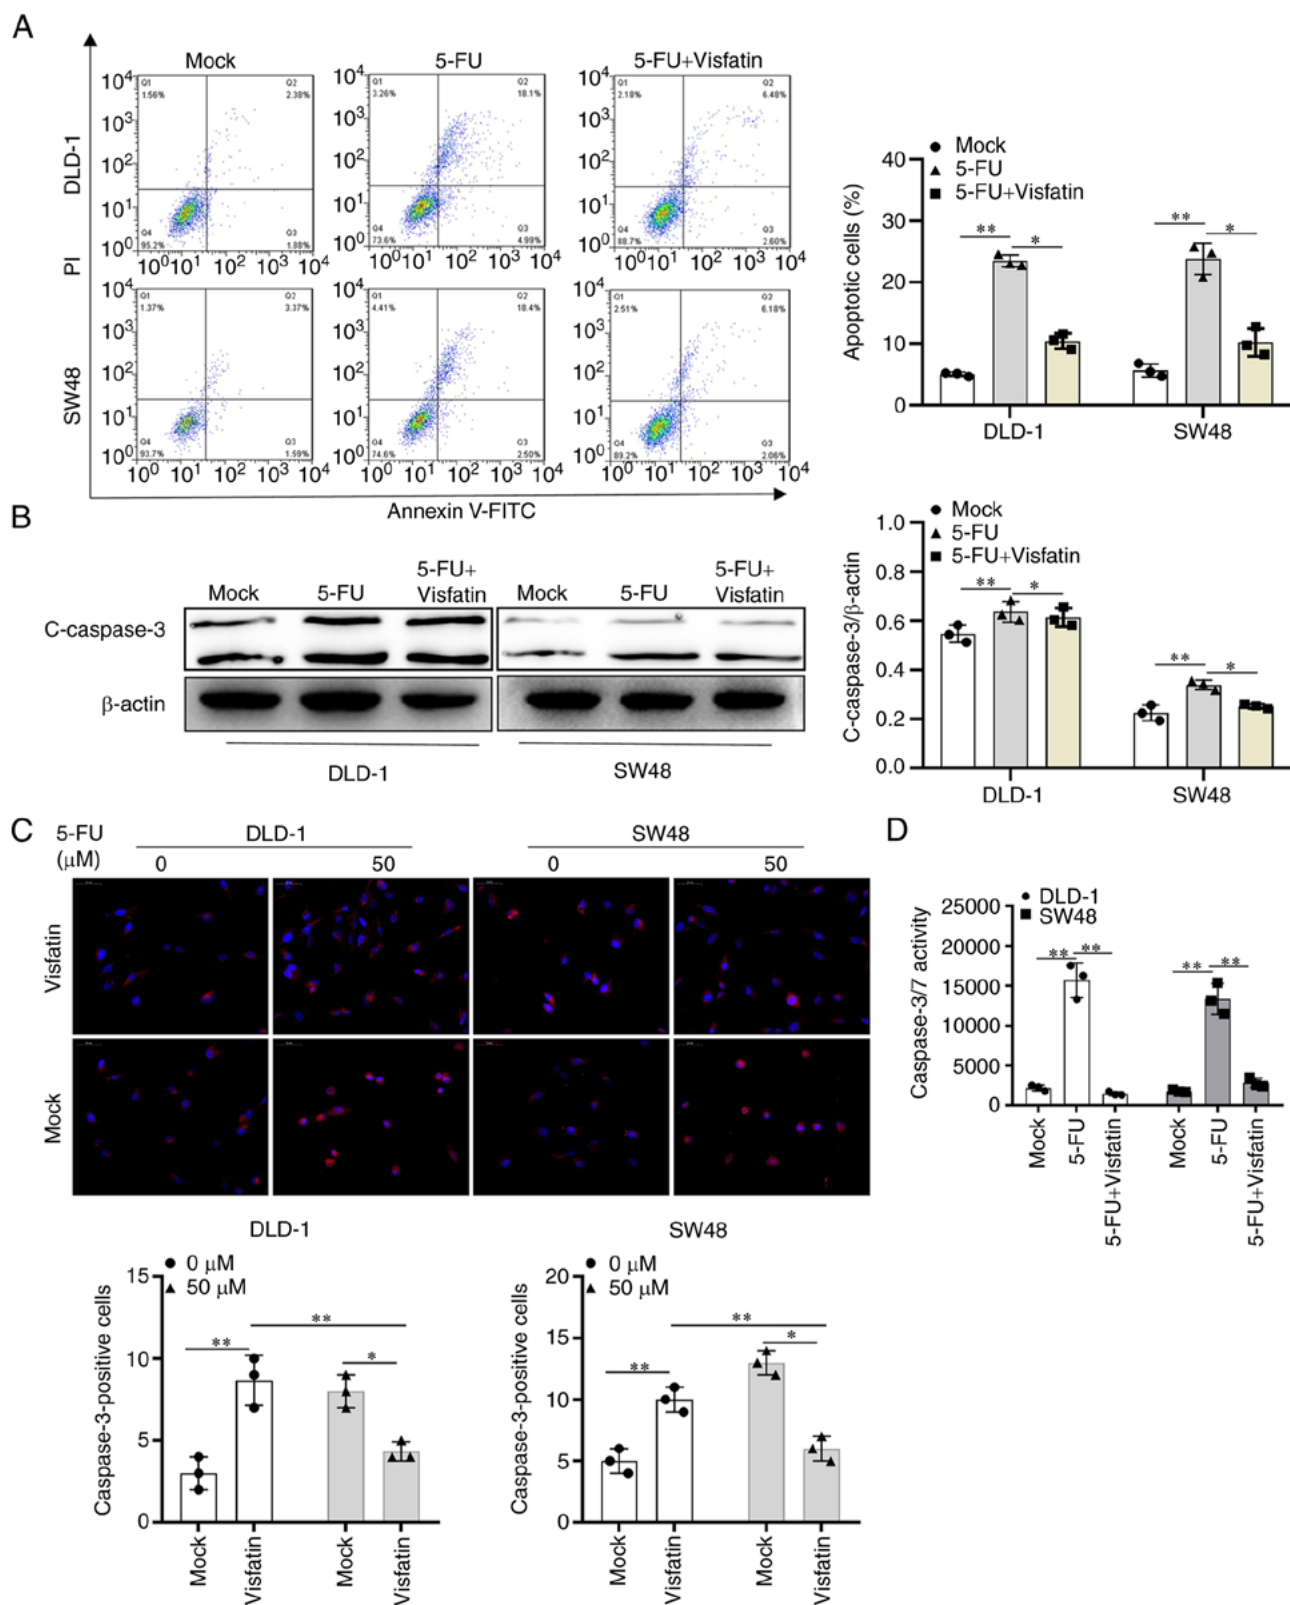

Supplement: Supplementary file 1 [file downloadSupplementary]
